# Supplementary material for: A nomogram for predicting plastic bronchitis in children with Mycoplasma pneumoniae pneumonia: a single-center retrospective study
Source: Research Square preprint supplement (doi:10.21203/rs.3.rs-5768597/v1), 2025-01-14
Supplement: Supplementary file 1 [file bd39c4cd46320d41a73475d9.docx]

### A nomogram for predicting plastic bronchitis in children with *Mycoplasma pneumoniae* pneumonia: a single-center retrospective study

Yuan Zhang1,3, Jie Min1,3, Liang Gong1* and Keyu Gao2*

1Department of Respiratory, Xuzhou Children's Hospital, Xuzhou 221000, Jiangsu, China.

2Department of Urology, The Afliated Hospital of Xuzhou Medical University, Xuzhou 221000, Jiangsu, China.

3These authors contributed equally: Yuan Zhang and Jie Min.

*Correspondence

Email: gong-liang1983@163.com; gaokeyu007@126.com
